# Supplementary material for: Elevated serum α-hydroxybutyrate dehydrogenase is an independent risk factor for survival outcomes in UTUC patients after radical nephroureterectomy
Source: Research Square preprint supplement (doi:10.21203/rs.3.rs-3139184/v1), 2023-07-06
Supplement: Supplementary file 1 [file 72efae2eb4c8c120a5cf5787.pdf]

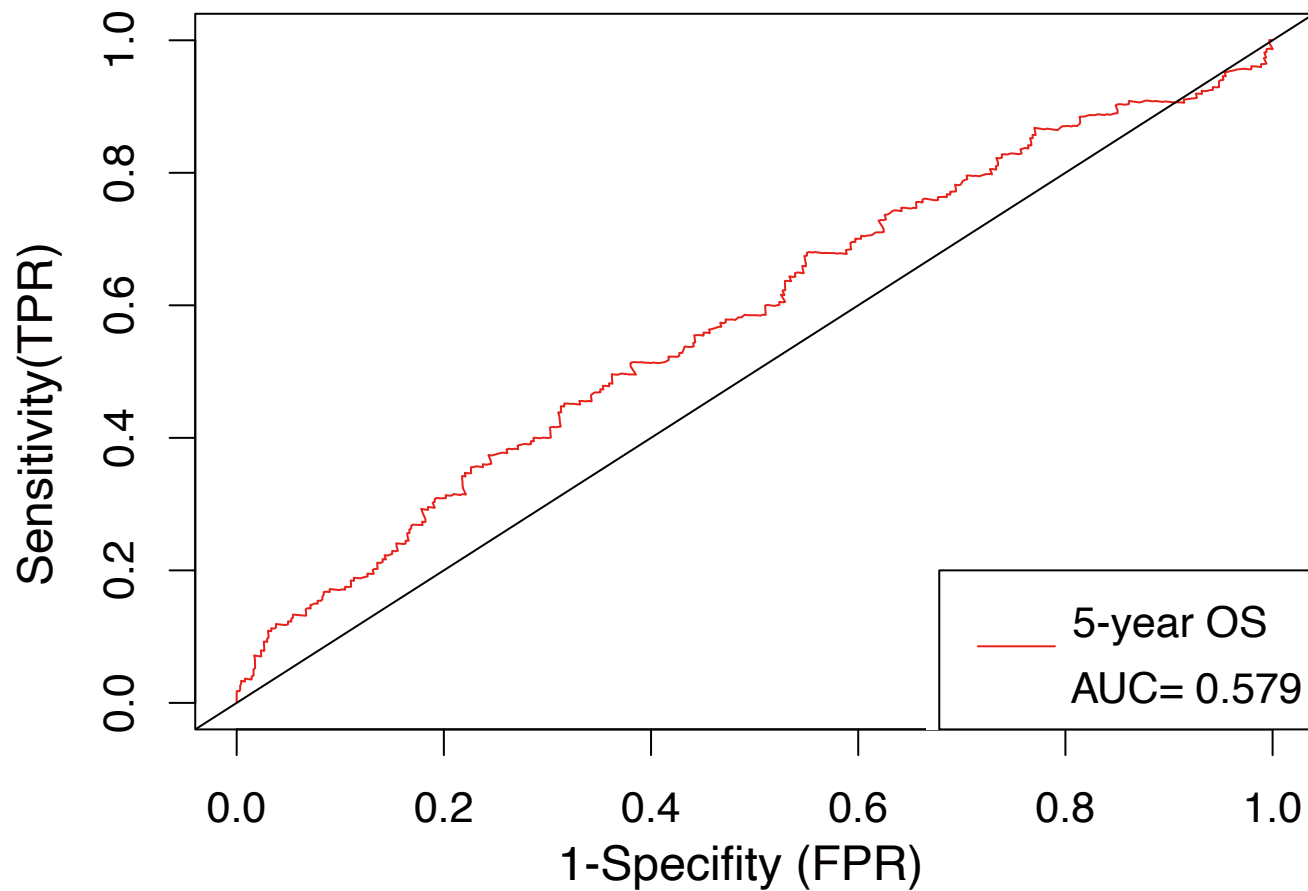

**Supplementary Figure 1.** ROC curve for the determination of the optimal cutoff level of a-HBDH.

**Abbreviations:** ROC= receiver operative characteristic; OS= overall survival; AUC= area under the curve; TPR= true positive rate; FPR= false positive rate; a-HBDH=a-hydroxybutyrate dehydrogenase
